# Supplementary material for: A comprehensive allele specific expression resource for the equine transcriptome
Source: PubMed Central journal article supplement (PMC11780778; doi:10.1186/s12864-025-11240-6), 2025-01-30
Supplement: 12864_2025_11240_MOESM4_ESM.pdf [file 12864_2025_11240_MOESM4_ESM.pdf]

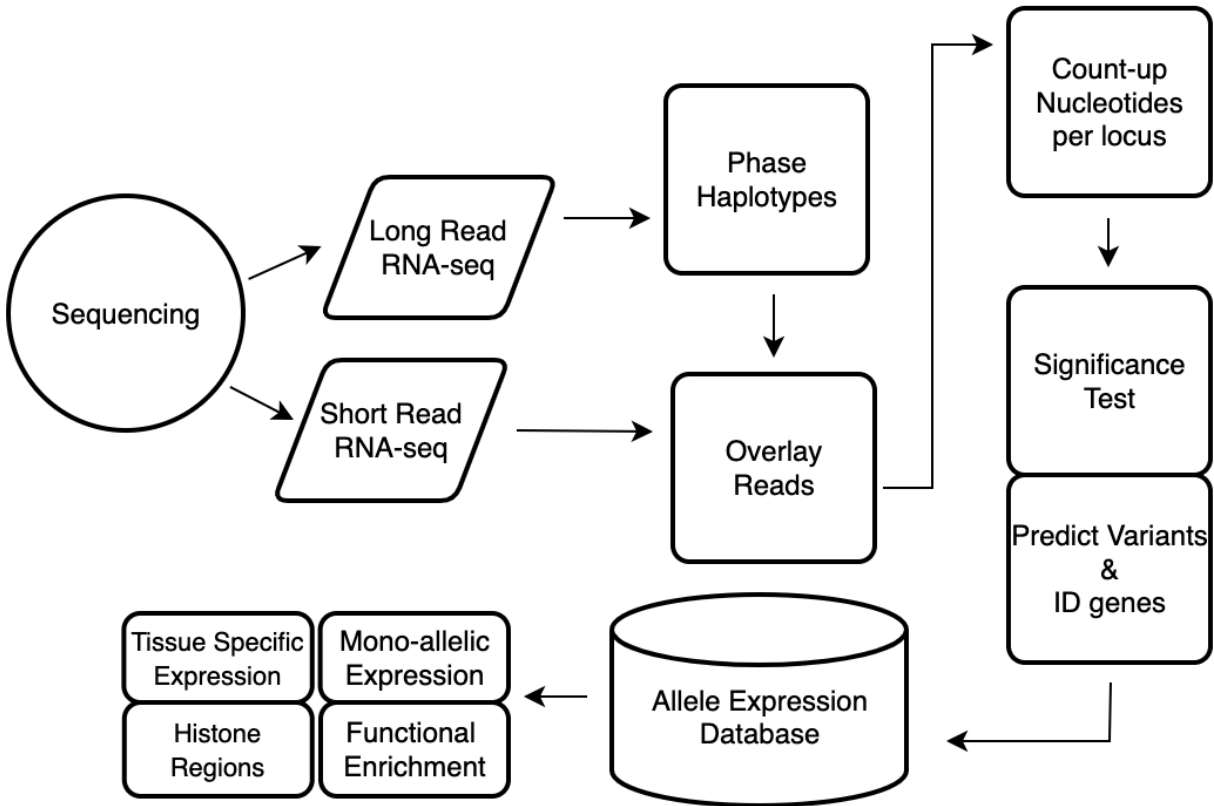

**Supplementary Figure 1 - Depiction of Pipeline Used for ASE Identification :** Flow chart summarizing the methods used in this study to identify and analyze the allele specifically expressed haplotypes
