# Supplementary material for: A comprehensive allele specific expression resource for the equine transcriptome
Source: PubMed Central journal article supplement (PMC11780778; doi:10.1186/s12864-025-11240-6), 2025-01-30
Supplement: 12864_2025_11240_MOESM5_ESM.pdf [file 12864_2025_11240_MOESM5_ESM.pdf]

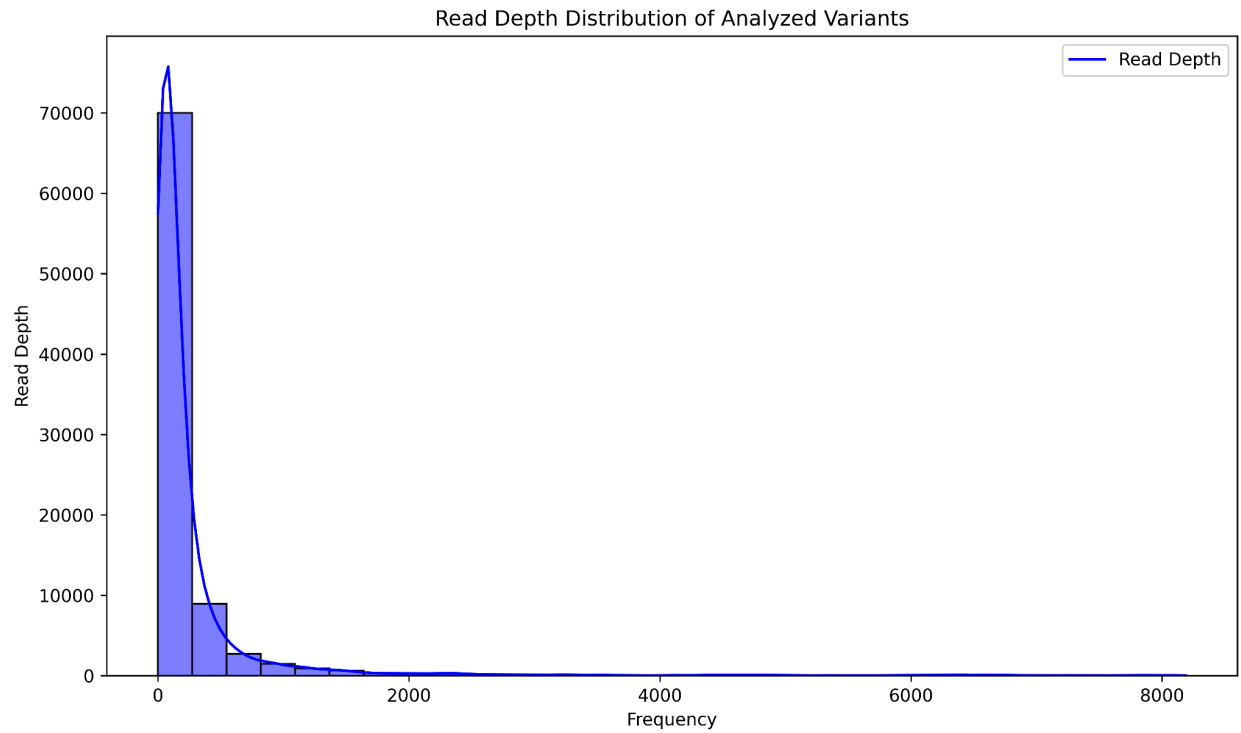

**Supplementary Figure 2 - Distribution of Read Counts for Heterozygous Loci** : The distribution of read depth for each of the loci used in this study's analysis
