# Supplementary material for: A comprehensive allele specific expression resource for the equine transcriptome
Source: PubMed Central journal article supplement (PMC11780778; doi:10.1186/s12864-025-11240-6), 2025-01-30
Supplement: 12864_2025_11240_MOESM6_ESM.pdf [file 12864_2025_11240_MOESM6_ESM.pdf]

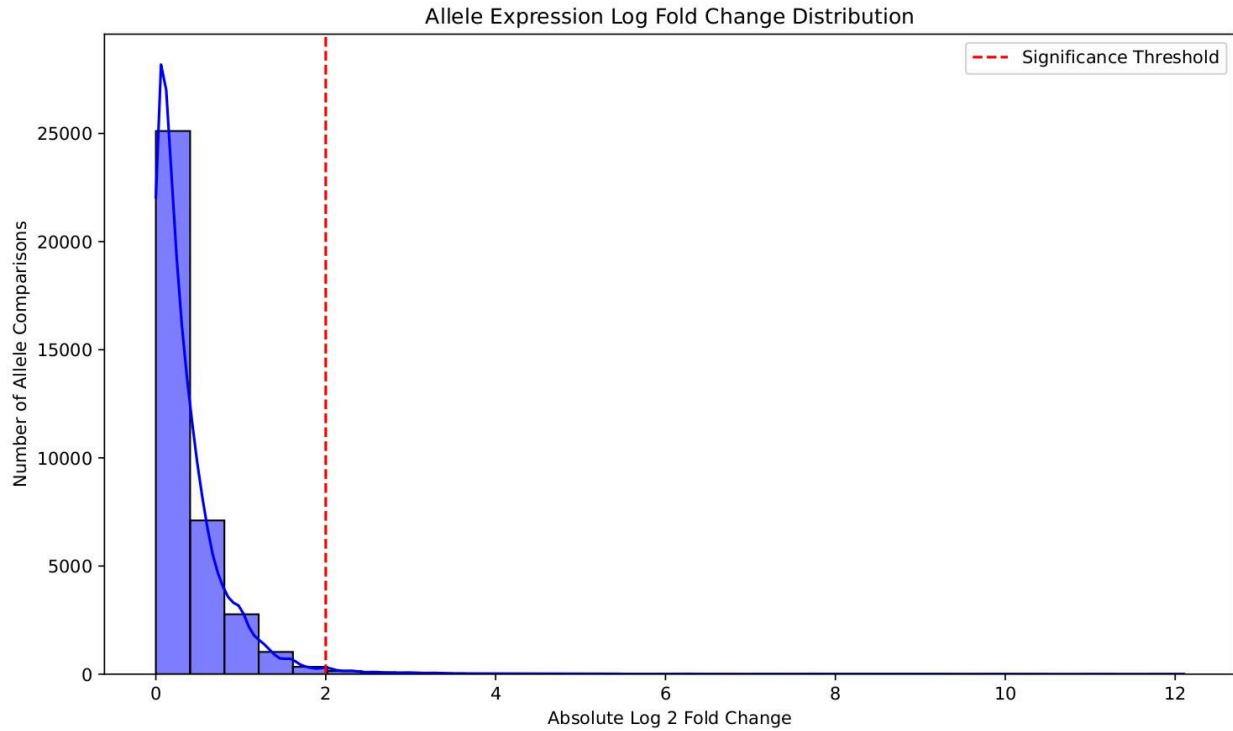

**Supplementary Figure 3 - Distribution of Allele Expression Fold Change for All Allele Comparisons** : The distribution of the allele expression fold changes for all of the loci analyzed in this study. The red dotted line represents the Allele expression fold change threshold for declaring a haplotype as potentially having a significant preference for being transcribed.
