# Supplementary material for: A comprehensive allele specific expression resource for the equine transcriptome
Source: PubMed Central journal article supplement (PMC11780778; doi:10.1186/s12864-025-11240-6), 2025-01-30
Supplement: 12864_2025_11240_MOESM7_ESM.pdf [file 12864_2025_11240_MOESM7_ESM.pdf]

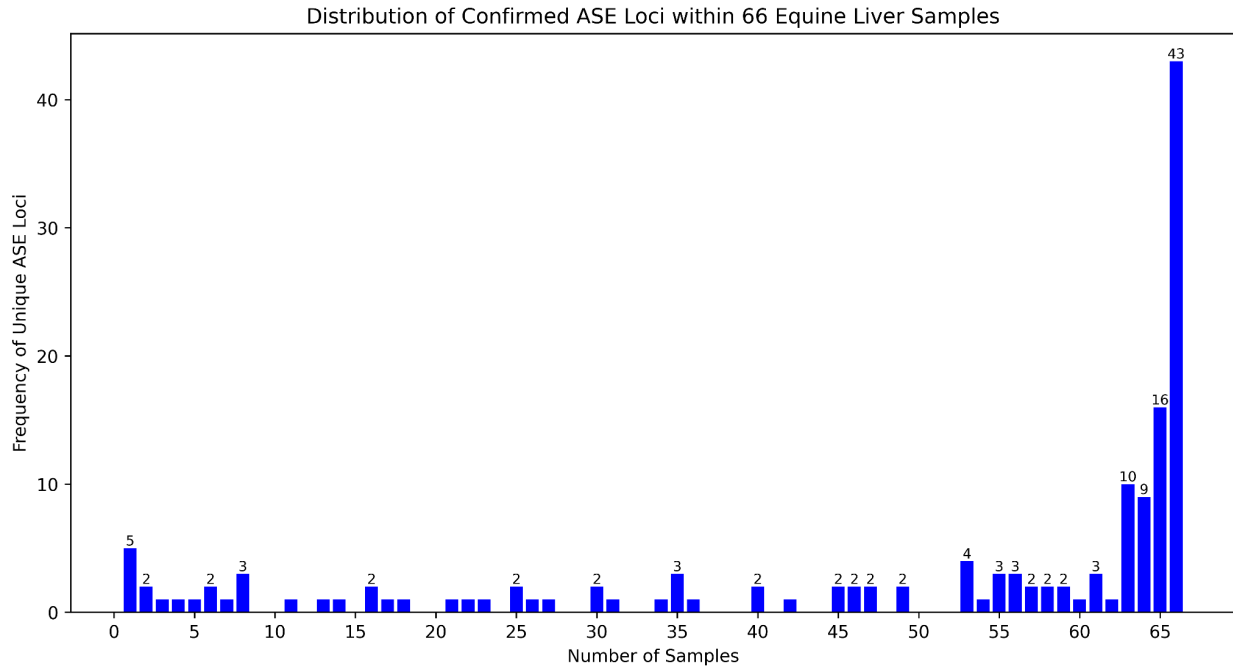

**Supplementary Figure 4 - Frequency of ASE Comparisons Verified in the Validation**

**Cohort :** This plot shows the frequency that identified ASE loci were confirmed in our validation set. For example, 43 haplotypes were confirmed to exhibit ASE in all of our liver samples in the validation cohort.
