# Supplementary material for: A comprehensive allele specific expression resource for the equine transcriptome
Source: PubMed Central journal article supplement (PMC11780778; doi:10.1186/s12864-025-11240-6), 2025-01-30
Supplement: 12864_2025_11240_MOESM8_ESM.pdf [file 12864_2025_11240_MOESM8_ESM.pdf]

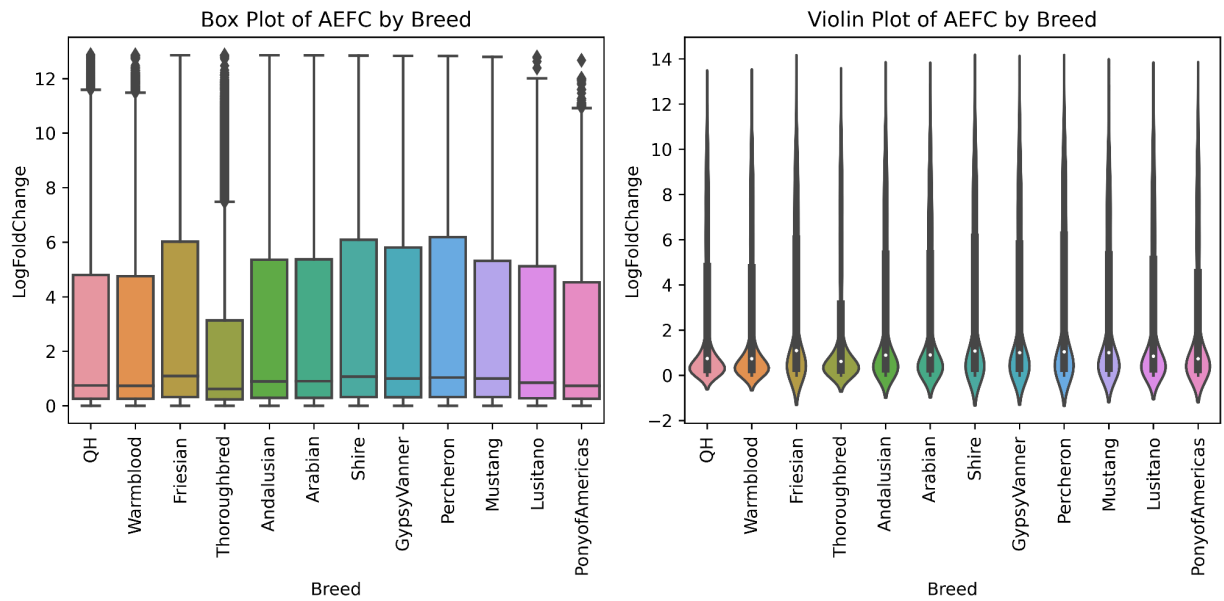

**Supplementary Figure 5 - Log Fold Change Distribution of Identified ASE Loci Across All**

**Breeds in the Validation Cohort** : Box and Violin Plots of the log fold change distribution of

identified ASE loci across all breeds in our validation cohort. QH = Quarter Horse
