# Supplementary material for: A comprehensive allele specific expression resource for the equine transcriptome
Source: PubMed Central journal article supplement (PMC11780778; doi:10.1186/s12864-025-11240-6), 2025-01-30
Supplement: 12864_2025_11240_MOESM11_ESM.pdf [file 12864_2025_11240_MOESM11_ESM.pdf]

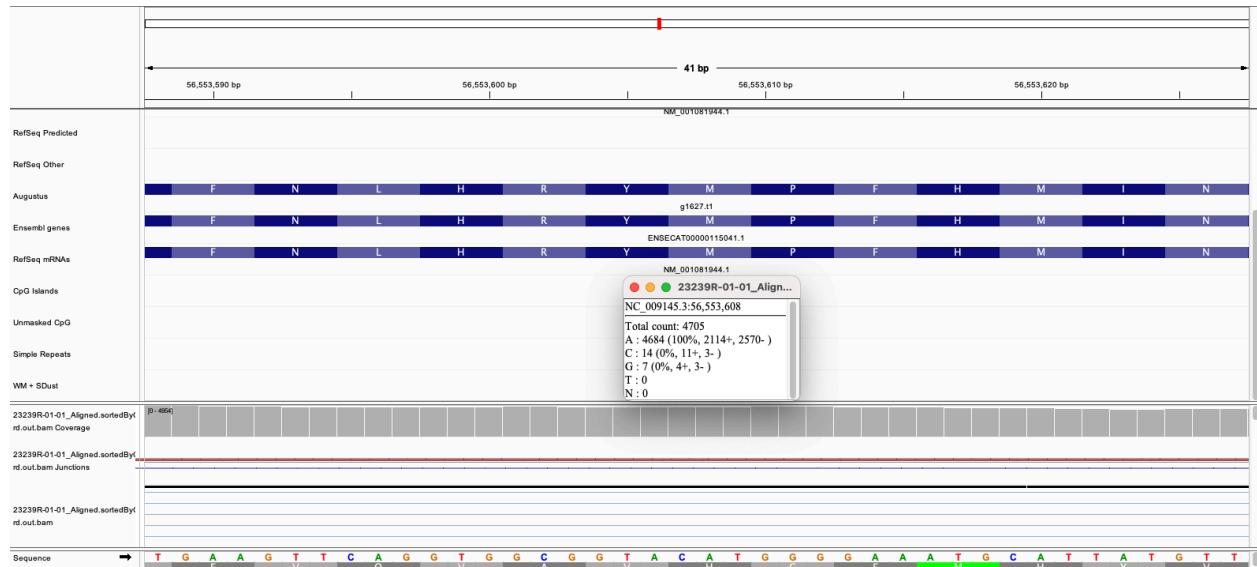

### Supplementary Figure 8 - Validated ASE Locus in *CLU* Gene : Integrated Genome Viewer

(IGV) screenshot showing the nucleotide counts of an ASE locus discovered in our original dataset, and confirmed in the validation set. This screen shot shows the results of this loci in one of the validation horses, and lies within the *CLU* gene.
